# Supplementary material
Source: publisher figshare collection journal article supplement (https://gsajournals.figshare.com/ndownloader/files/38008917)
Supplement: Supplementary file 1 [file 38008917]

Table S7. Number and classification of full-length long terminal repeat retrotransposons (LTR-REs) identified in the genomes of five Rosaceae species.

| **CLASS I - LTR-RE** | ***Rubus argutus*** | ***Fragaria vesca*** | ***Potentilla micrantha*** | | ***Prunus persica*** | | ***Malus domestica*** | |
| --- | --- | --- | --- | --- | --- | --- | --- | --- |
| ***Gypsy*** | **217** | **54** | **233** | | **124** | | **1,559** | |
| *chromovirus|CRM* | 6 | 16 | 3 | | 20 | | 4 | |
| *chromovirus|Galadriel* | 2 | 2 | 1 | | ND | | ND | |
| *chromovirus|Reina* | 21 | 2 | 16 | | 4 | | 60 | |
| *chromovirus|Tekay* | 12 | 2 | 4 | | 13 | | 58 | |
| *non-chromovirus|OTA|Athila* | 102 | 1 | 7 | | 4 | | 187 | |
| *non-chromovirus|OTA|Ogre/Tat* | 74 | 31 | 202 | | 83 | | 1250 | |
| ***Copia*** | **409** | **144** | **228** | | **564** | | **1,097** | |
| *Ale* | 30 | 19 | 18 | | 171 | | 197 | |
| *Alesia* | 1 | ND | ND | | ND | | 25 | |
| *Angela* | 2 | ND | ND | | ND | | 154 | |
| *Bianca* | 274 | 102 | 157 | | 267 | | 346 | |
| *Ikeros* | 39 | 2 | 12 | | 2 | | 62 | |
| *Ivana* | 22 | 13 | 30 | | 100 | | 191 | |
| *SIRE* | 20 | 1 | 6 | | 14 | | 4 | |
| *TAR* | ND | ND | ND | | 2 | | 5 | |
| *Tork* | 21 | 7 | 5 | | 8 | | 113 | |
| **Unclassified** | **10** | **6** | **2** | | **6** | | **6** | |
| **Total LTR-RE** | **636** | **204** | | **463** | | **694** | | **2,662** | |
